# Supplementary material
Source: Springer Nature journal article supplement (https://www.springermedizin.de/resource/supplementary/12884_2012_799_MOESM4_ESM.pdf/9458224)

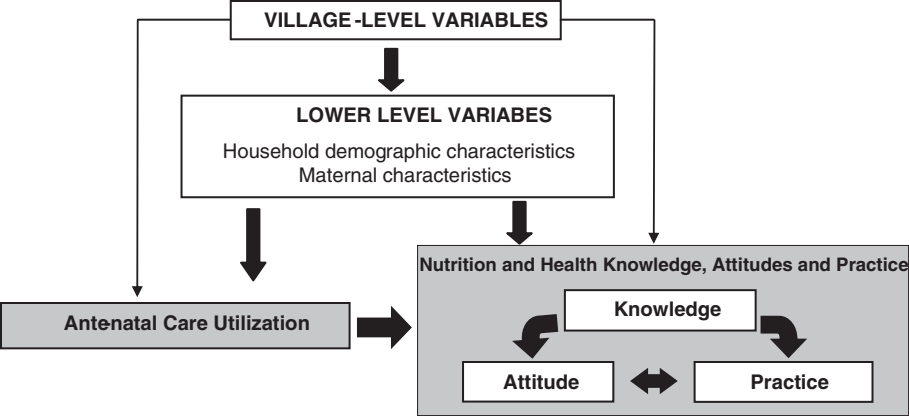

Supplement: MOESM4 [file 9458224]
